# Supplementary material for: Annexin A1 drives macrophage skewing to accelerate muscle regeneration through AMPK activation
Source: PubMed Central journal article supplement (PMC7269594; doi:10.1172/jci124635), 2020-02-04
Supplement: jci-130-124635-s150.pdf [file jci-130-124635-s150.pdf]

**Suppl Fig 1. Related to Figure 1.**

(A) HE staining of non-injured Wild-Type and *AnxA1*<sup>-/-</sup> *Tibialis Anterior* (TA) muscles. White bar = 50  $\mu\text{m}$ . (B) Myofibre cross-sectional area of non-injured Wild-Type and *AnxA1*<sup>-/-</sup> TA muscles. Shown is

the mean  $\pm$  SEM of 8 muscles. (C) Number of nuclei *per* myofibre in muscles 7 days post-CTX injury. (D) Representative images of Sudan black staining of TA muscles from Wild-Type, AnxA1<sup>-/-</sup> and Fpr2/3<sup>-/-</sup> mice 28 days post-cardiotoxin injury. (E) Representative FACS plots of F4/80 and Ly6C/G markers in TA of Wild-Type, AnxA1<sup>-/-</sup> and Fpr2/3<sup>-/-</sup> mice 2 days post-cardiotoxin injury. (F-G) Macrophage subtypes analysis in Wild-Type and Fpr1<sup>-/-</sup> muscles 2 days post-CTX injury. Shown are the percentage of pro- and anti-inflammatory macrophages within the F4/80<sup>+</sup> population (F) and the resolution index (G). Results are mean  $\pm$  SEM of at least three animals. \*p<0.05 *versus* Wild-Type.

**Suppl Fig 2. Related to Figure 2. Gating strategy to isolate cell populations from *Tibialis anterior* muscle.**

TA muscles were digested with Collagenase B/Dispase and cells were separated by magnetic beads based on their CD45 expression level. (A) CD45<sup>pos</sup> cells were blocked with anti-FcγRII/III and labelled with CD45, CD64 and Ly6C antibodies to isolate Neutrophils (Neut) and Ly6C<sup>pos</sup> and Ly6C<sup>neg</sup> macrophages (Mac). Shown are representative plots for day 4 post-CTX injury together with purity check for recovered populations (coloured boxes). Numbers represent sorting purity calculated as percentage of live cells. (B) CD45<sup>neg</sup> cells were labelled with CD45, CD31, Sca-1, α7-integrin and CD34 antibodies to isolate endothelial cells (EC), FAPs (FAP) and satellite cells (SAT). Shown are representative plots at day 4 (A) and day 1 (B) post-CTX injury, together with purity check for recovered populations (coloured boxes). Numbers represent sorting purity calculated as percentage of live cells.

**Suppl Fig 3. Related to Figure 2. Immune cell recruitment and pattern of AnxA1 expression in cardiotoxin-induced muscle injury and repair.**

(A) Anxa1 mRNA level measured by RT-qPCR on sorted cell populations from *Tibialis Anterior* muscle after cardiotoxin injury. (B-D) Immunofluorescence analysis of ANXA1 protein in *Tibialis Anterior* muscle after cardiotoxin injury. Images show co-localisation of ANXA1 protein with Ly6G<sup>+</sup> (B) and F4/80<sup>+</sup> (C) cells. White bar = 50 μm. (D) Quantification of F4/80<sup>+</sup> ANXA1<sup>+</sup> cells in *Tibialis Anterior* (TA) muscle after cardiotoxin (CTX) injury.

**Suppl Fig 4. Related to Figure 2. Immune cell recruitment and Fpr2/3 expression in cardiotoxin-induced muscle injury and repair.**

(A) Fpr2/3 mRNA level measured by RT-qPCR on sorted cell populations from *Tibialis Anterior* muscle after cardiotoxin injury. (B-C) Quantification of F4/80<sup>+</sup> ANXA1<sup>+</sup> cells in *Tibialis Anterior* (TA) muscle after cardiotoxin (CTX) injury. Representative immunofluorescence analysis of Fpr2/3 protein in TA

muscle after cardiotoxin (CTX) injury (B) and quantification of the percentage of F4/80<sup>+</sup> cells expressing Fpr2/3 (C). White bar = 50  $\mu$ m. Results are means  $\pm$  SEM of three animals. \* $p < 0.05$  and \*\*\* $p < 0.001$  versus Day 0.

**Suppl Fig 5. Related to Figure 2. BMT controls**

(A) Body weight follow-up, represented as percentage of Day 0, of mice after irradiation and bone marrow transplantation. Results are means  $\pm$  SEM of at least six animals. \* $p < 0.05$  versus Day 0. (B-C) Representative FACS plots (B) and quantification (C) of the GFP<sup>+</sup> monocytes in the bone marrow of the sacrificed animals. (D-E) Representative FACS plots (D) and quantification (E) of the percentage of macrophages with host or donor origin based on their GFP expression. Shown are TA muscles between day 2 and day 8 post-CTX injury.

**Suppl Fig 6. Related to Figure 3. FPR2/ALX expression varies following human macrophage polarisation.**

Human primary macrophages were polarised into M1 or M2 macrophages with IFN $\gamma$  and IL-4, respectively (A-C) Flow cytometry analysis of FPR2/ALX expression. Shown are representative FACS plots (A), percentage of cells expressing FPR2/ALX (B) and FPR2/ALX MFI (C). (D) RT-qPCR analysis of FPR2/ALX mRNA level. Results are means  $\pm$  SEM of at least four independent experiments. \* $p < 0.05$  versus M0 (non-activated).

**Suppl Fig 7. Related to Figure 5.**

(A) Human PBMC-derived macrophages were transfected by a non-targeting or three different AMPK $\alpha$ 1-targeting siRNAs and treated with 10 nM hrANXA1 for 24 h. AMPK $\alpha$ 1 protein level was determined by western blot. (B) Primary myoblasts were differentiated for 3 days in presence of 10 nM hrANXA1 or conditioned medium produced by murine macrophages treated by 10 nM hrANXA1. Each dot corresponds to an independent experiment.

**A**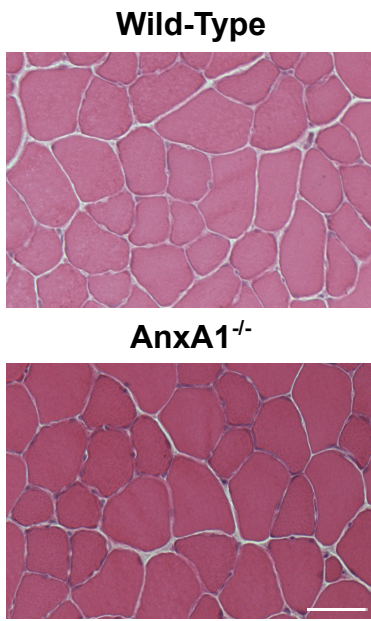**B**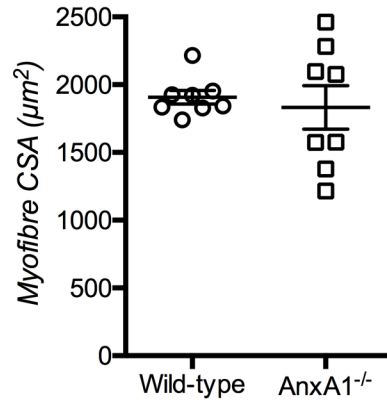**C**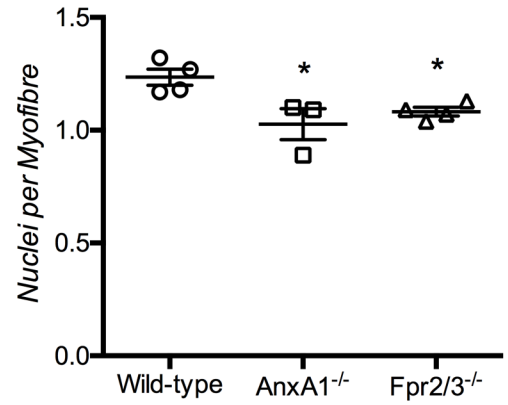**D**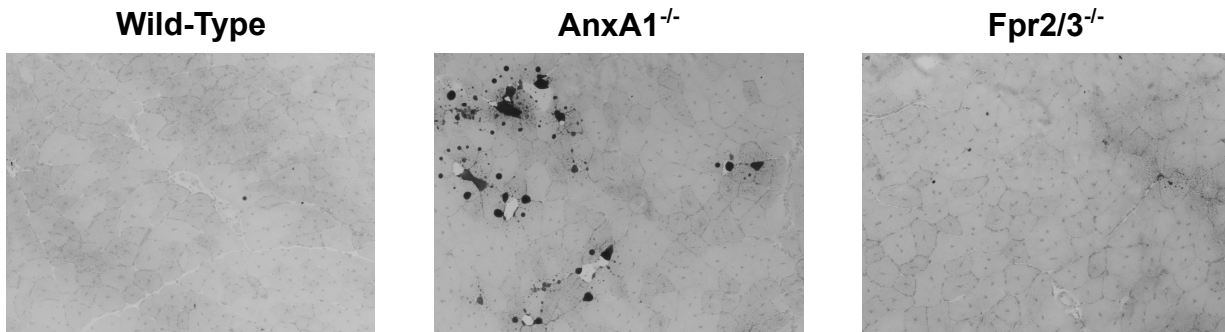**E**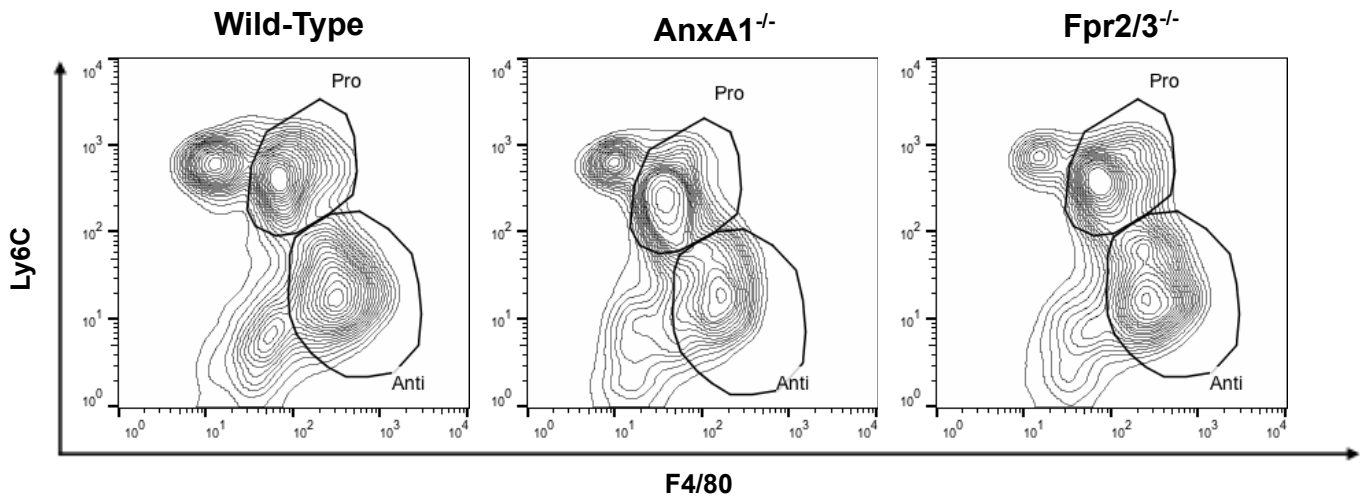**F**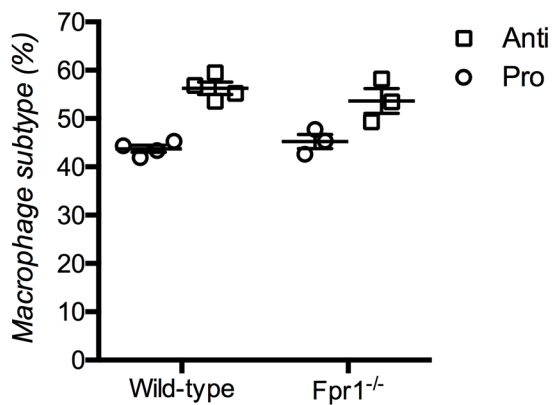**G**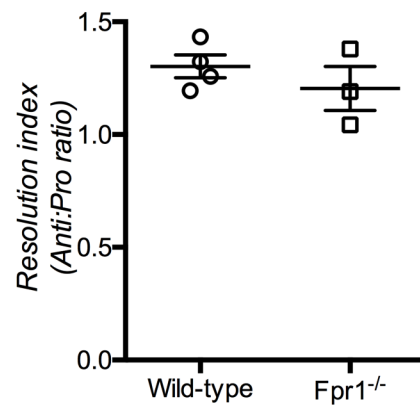

Supplementary Figure 1

**A**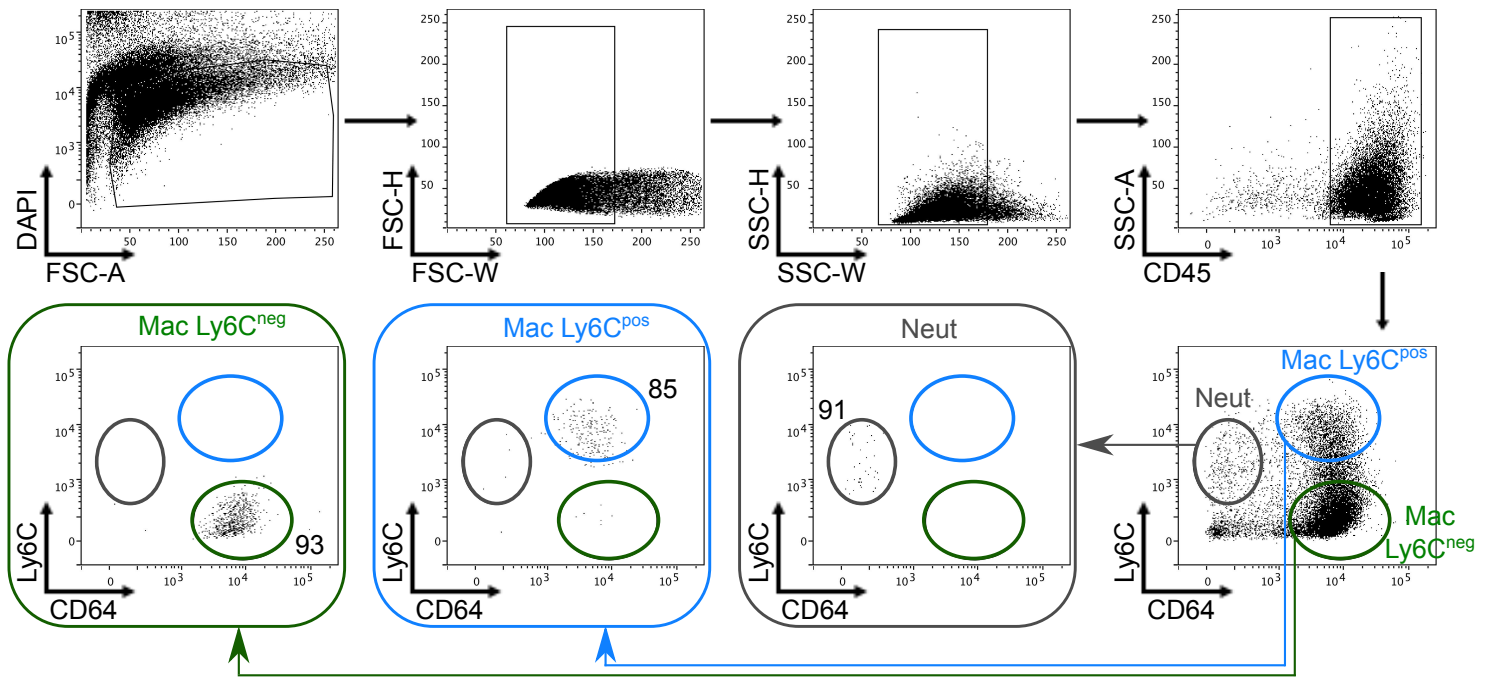**B**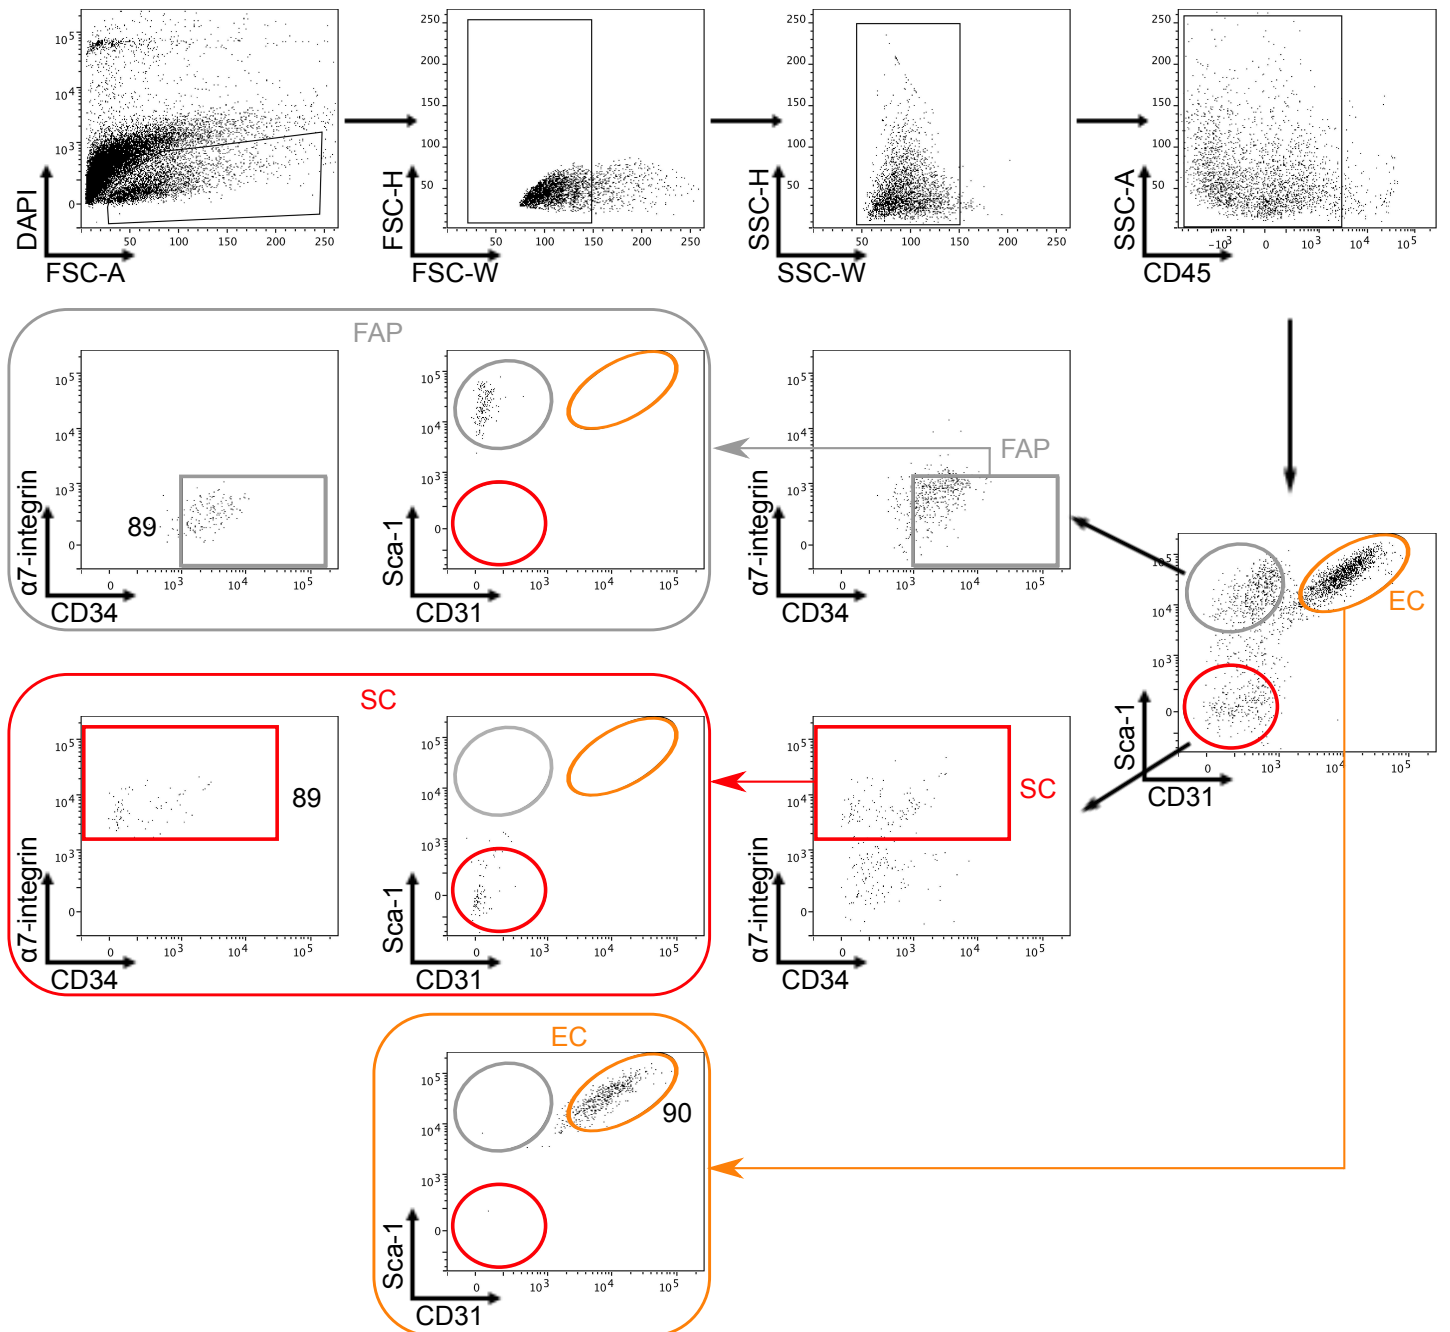

Supplementary Figure 2

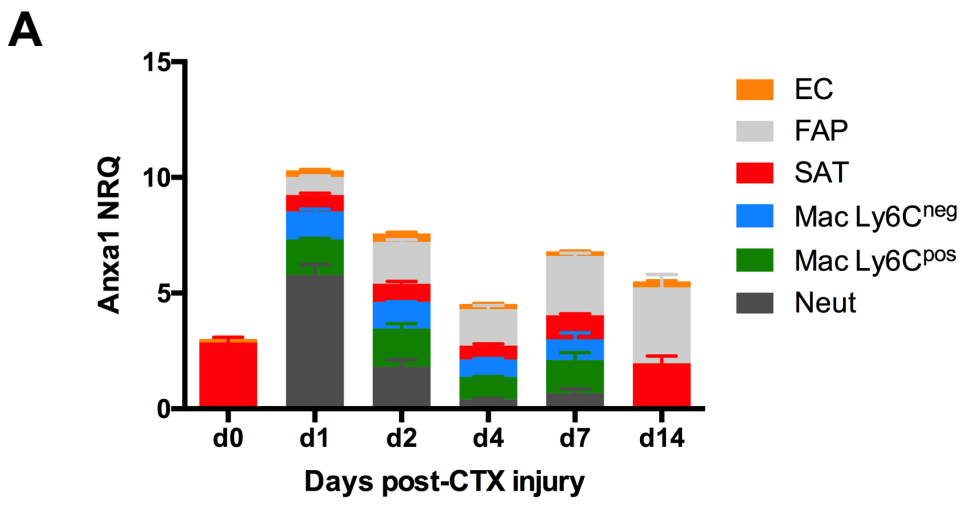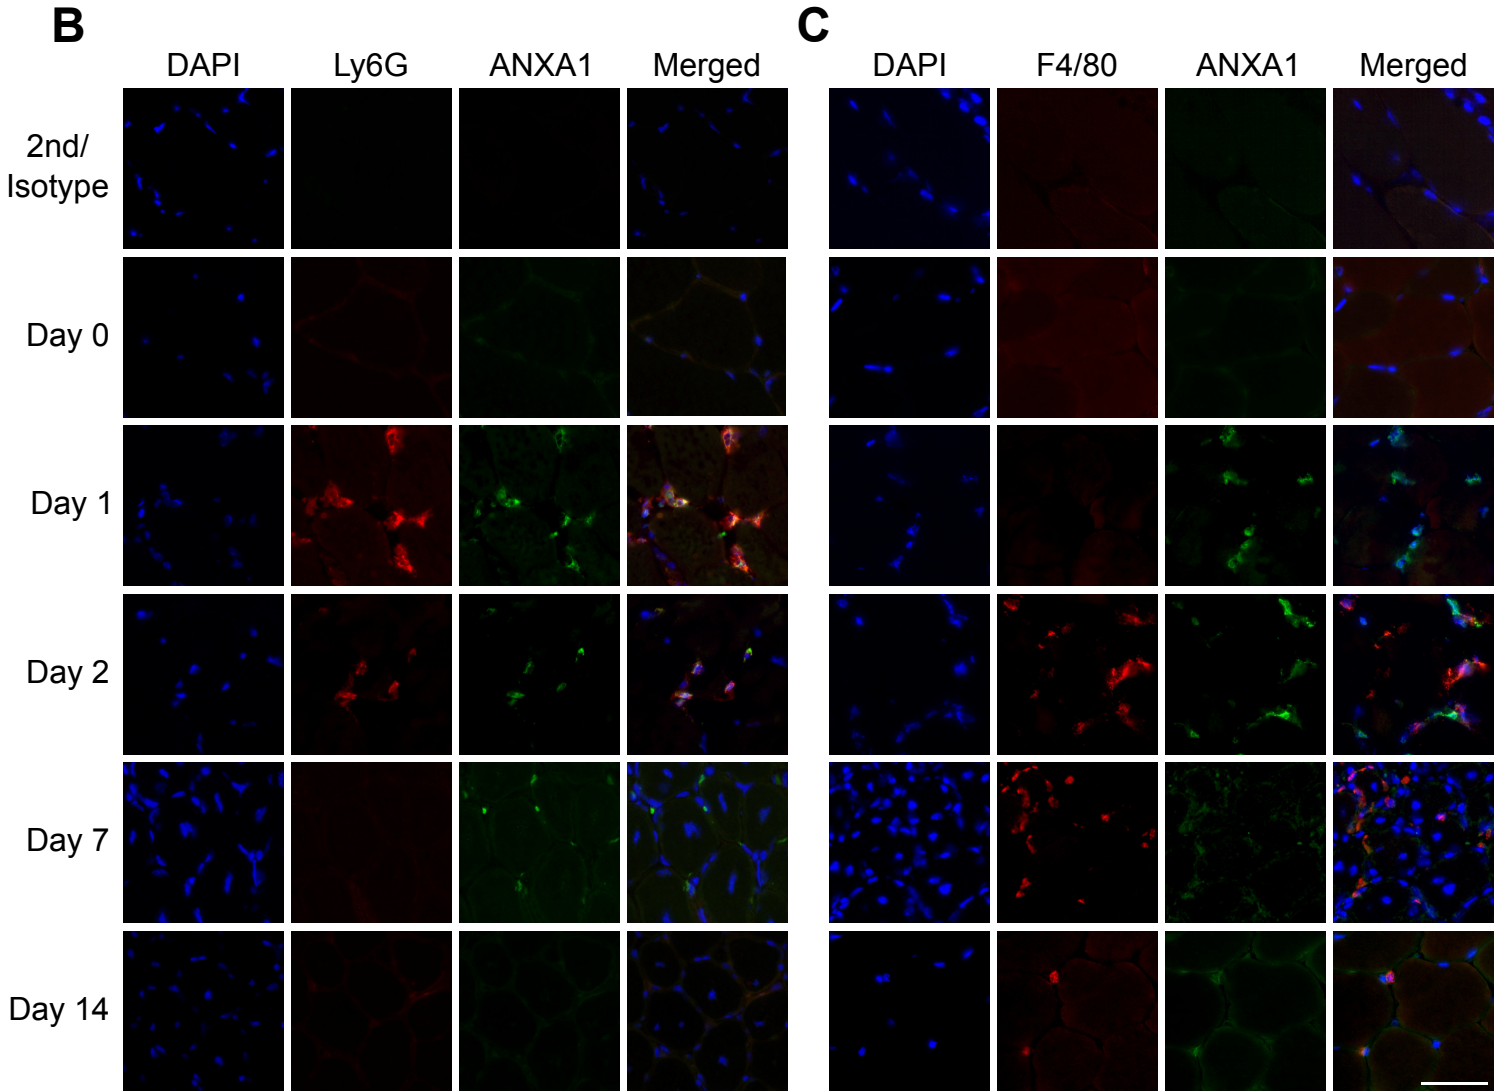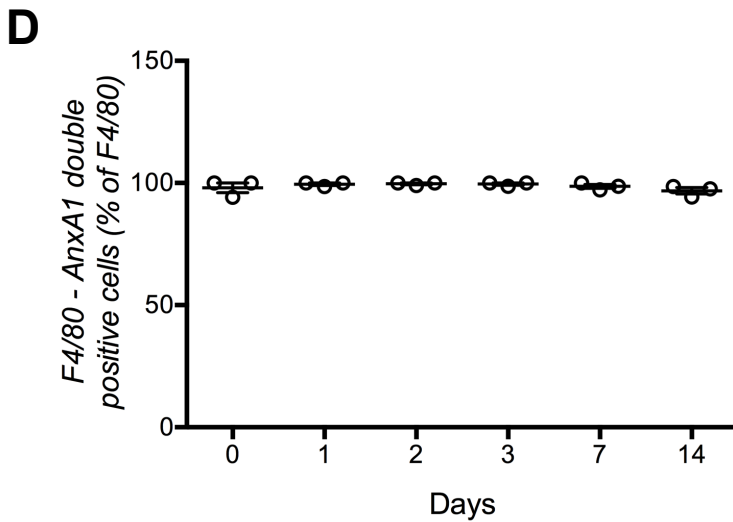

Supplementary Figure 3

**A**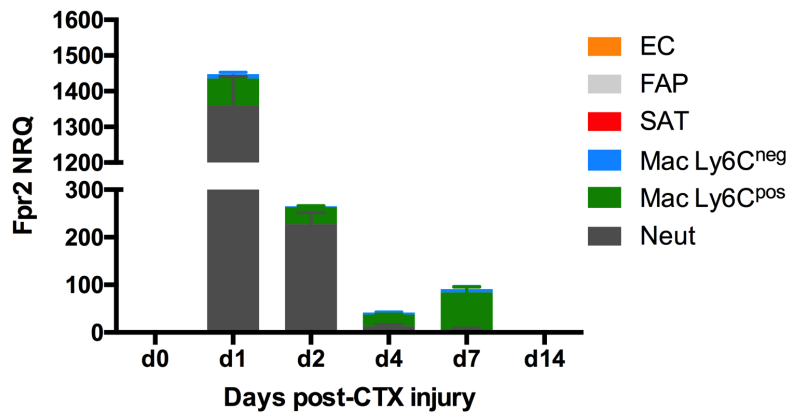**B**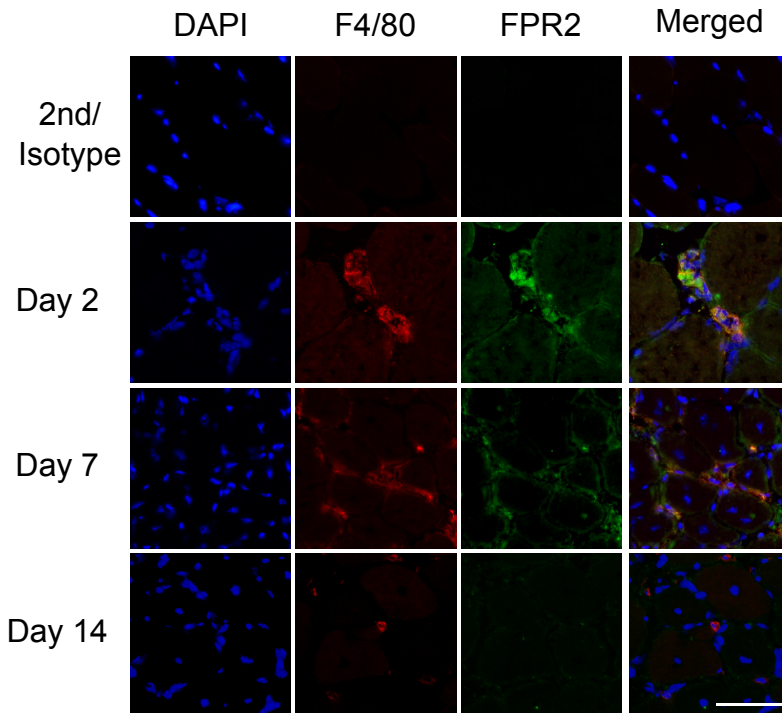**C**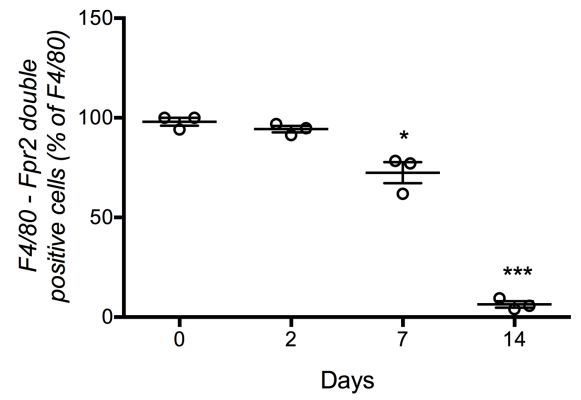**Supplementary Figure 4**

**A**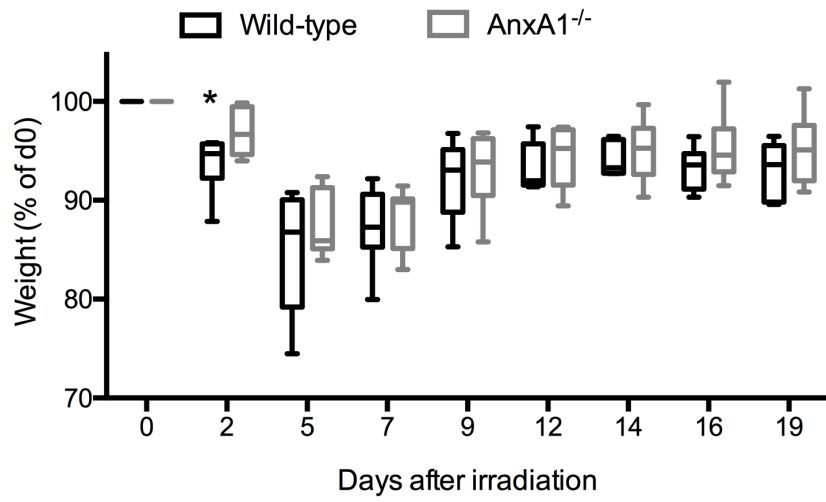**B**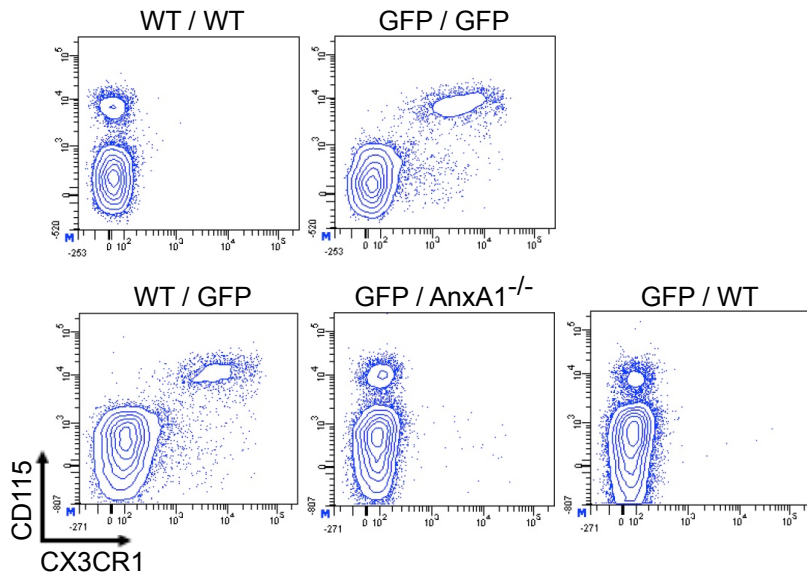**C**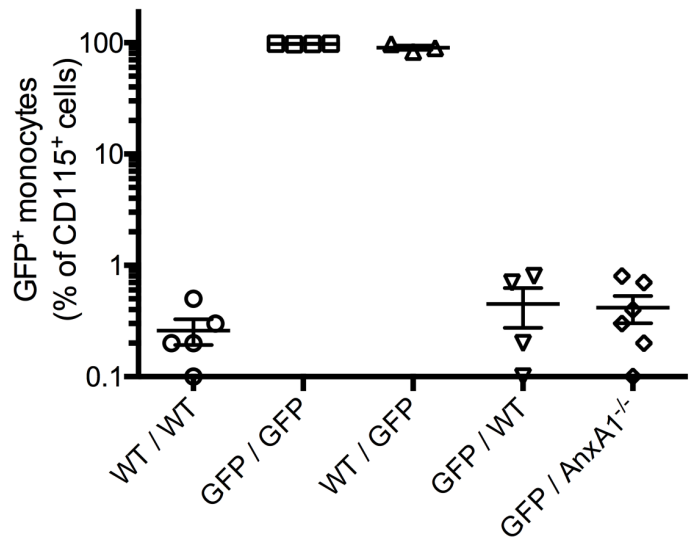**D**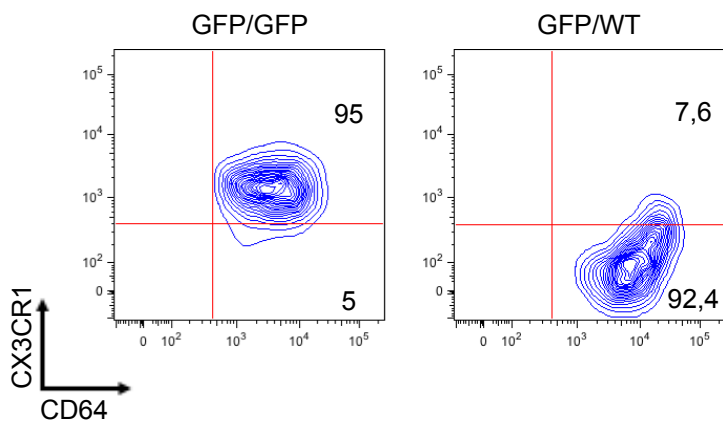**E**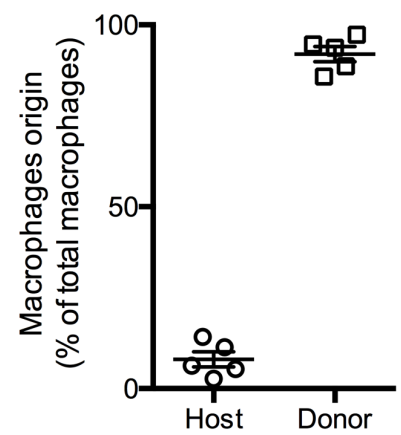

Supplementary Figure 5



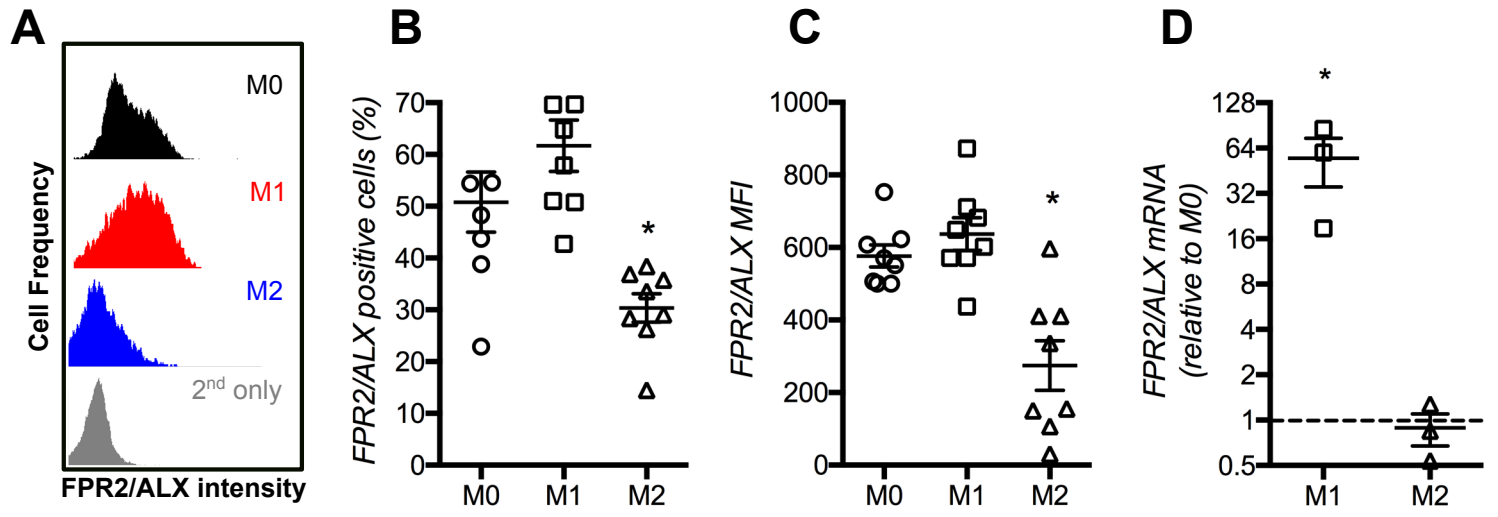

Supplementary Figure 6

**A**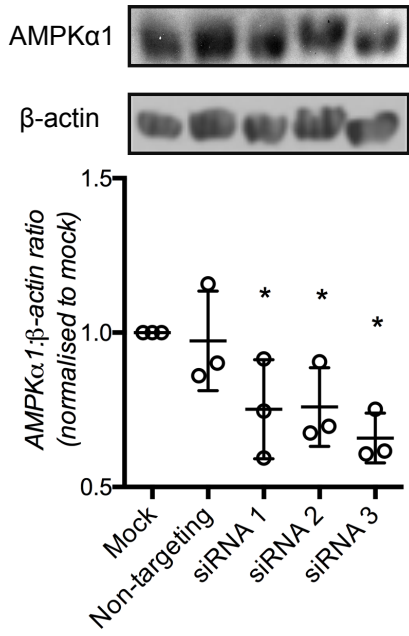**B**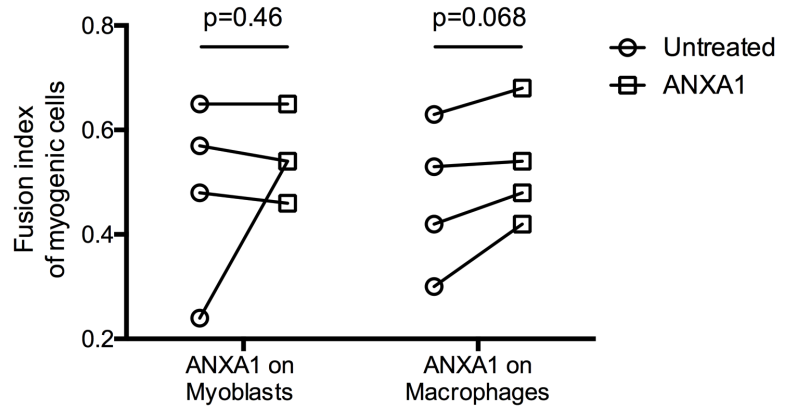**Supplementary Figure 7**
